of this expensive volume. On the other hand, it contains enough interesting detail to make it a useful addition to medical libraries in general, and especially to the libraries of Anesthesia Departments engaged in teaching and research.

FRANCIS F. FOLDES, M.D.

**A Manual of Anaesthetic Techniques. Second Edition.** By WILLIAM J. PRYOR, M.B., Ch.B. (N.Z.), F.F.A. R.C.S. (Eng.), D.A. (Eng.), F.F.A. R.A.C.S., Anaesthetist, Thoracic Unit, Christchurch Hospital (N.Z.) and Late Anaesthetic Registrar, The London and Poplar Hospitals, London, England. Foreword by the Late J. H. T. Challis, M.R.C.S. (Eng.), L.R.C.P. (Lond.), F.F.A. R.C.S. (Eng.), D.A. (Eng.), Formerly Senior Anaesthetist, The London Hospital. Cloth \$7.00. Pp. 228, with 75 illustrations. John Wright & Sons Ltd., Bristol, England, 1959. Obtainable from The Williams & Wilkins Co., Baltimore 2, Md., U.S.A., exclusive U.S. agents.

This is the second edition of an excellent manual on equipment. The reviewer doubts that it will have a wide sale in this country since so many drugs and pieces of equipment have names which are strange to us. Especially recommended is the chapter, albeit much abbreviated, on "Pre-operative Conditions Requiring Special Care." I think almost anyone in the U.S.A. would be startled to read in the chapter on "Premedication" that the recommended dosage of atropine sulfate for an infant up to one year of age is 0.4 mg. The chief virtue of the book to this department is to stimulate us to complete our own procedure manual.

ALICE MCNEAL, M.D.

**Narcotics. Lingo and Lore.** By J. E. SCHMIDT, Ph. B.S., M.D., Litt.D., Pres. The American Society of Grammatolators. Cloth \$4.25. Pp. 199, without illustrations. Charles C Thomas, Publisher, 301-327 East Lawrence Ave., Springfield, Illinois, 1959.

This book is a small lexicon published to clarify slang and other terms used by illegal dealers and users of narcotics. It has been compiled by the Chairman of the National Association on Standard Medical Vocabulary. The author has made much effort to differentiate multiple slang synonyms from one another. It is to be recommended to those who are interested in learning the meaning of the terminology used by drug addicts.

ROBERT W. VIRTUE, M.D.

**Les Médicaments du Système Nerveux Cérébro-Spinal.** Masson et Cie, Editors. Published under the direction of Professor F. Mercier. Paper 5800 francs. Pp. 573, with illustrations. Masson et Cie, Éditeurs, Libraires de l'Académie de Médecine, 120 Boul. Saint-Germain, Paris 6<sup>e</sup>, 1959.

This is a weighty volume, in a physical sense as well as in its content. For the anesthesiologist who reads French it covers in 12 chapters groups of drugs having similar actions. It is a pharmacological textbook with excellent bibliography and a large index. The chapters are up-to-date and contain much which has only recently been published in various journals. The book is not written primarily for the anesthesiologist, but is well worth reading by anyone interested in drugs acting on the central nervous system. The volume is paper backed and the binding breaks down easily.

PAUL R. DUMKE, M.D.
